# Supplementary material for: Prevalence and Risk Factors of Depression and Posttraumatic Stress Disorder After a Mass Shooting
Source: PubMed Central journal article supplement (PMC10951730; doi:10.1001/jamanetworkopen.2024.2739), 2024-03-19
Supplement: jamanetwopen-e242739-s002.pdf [file jamanetwopen-e242739-s002.pdf]

## **Data Sharing Statement**

### **Data**

**Data available:** No
